# Supplementary material for: ATP cleavage by cone tetraguanidinocalix[4]arene
Source: Royal Society of Chemistry journal article supplement (doi:10.1039/c2ob26688a), 2012-01-01
Supplement: c2ob26688a.pdf [file c2ob26688a.pdf]

## Electronic Supplementary Information for

### ATP Cleavage by *Cone* Tetraguanidinocalix[4]arene

Riccardo Salvio,<sup>\*a</sup> Alessandro Casnati,<sup>\*b</sup> Luigi Mandolini,<sup>a</sup> Francesco Sansone<sup>b</sup> and  
Rocco Ungaro<sup>b</sup>

<sup>a</sup> Dipartimento di Chimica and IMC - CNR Sezione Meccanismi di Reazione, Università La Sapienza, 00185 Roma, Italy. [riccardo.salvio@uniroma1.it](mailto:riccardo.salvio@uniroma1.it)

<sup>b</sup> Dipartimento di Chimica, Università degli Studi di Parma, Parco Area delle Scienze 17/A, 43124 Parma, Italy. [casnati@unipr.it](mailto:casnati@unipr.it)

#### Table of Contents

|                                           |    |
|-------------------------------------------|----|
| General Experimental Section .....        | S2 |
| Acid-base Potentiometric Titrations ..... | S2 |
| Rate Measurements .....                   | S6 |
| References .....                          | S7 |

## General Experimental Section

**Instruments.** The  $^{31}\text{P}$  NMR spectra were recorded at 121.42 MHz on a Bruker Unity 300 MHz. Chemical shifts are relative to an external reference of 85%  $\text{H}_3\text{PO}_4$ . A capillary filled with  $\text{D}_2\text{O}$  inside the NMR tube was used to lock the deuterium signal.

**Materials.** DMSO purged 30 min with argon and mQ water were used in the preparation of the mixed solvent used in kinetic and potentiometric experiments. Calixarenes **1-4** were available from a previous investigation.<sup>1</sup> Commercial samples of  $\text{ATP}\text{H}_2\text{Na}_2$ ,  $\text{ADP}\text{H}_2\text{Na}$  and  $\text{Me}_4\text{ClO}_4$  were used as received.

## Potentiometric Titrations

Potentiometric titrations were performed by an automatic titrator equipped with a combined microglass pH electrode. The electrode was calibrated using standard  $\text{HClO}_4$  and  $\text{Me}_4\text{NOH}$  solutions at different concentrations. The time required to obtain a stable pH reading increased from 1 min in acid medium, up to 6 min at pH above 9. The calibration plot of calculated  $-\log c_{\text{H}^+}$  values vs experimental pH readings was linear in the range 2-17, with  $-\log c_{\text{H}^+} = a + b \cdot \text{pH}_{\text{read}}$ , and best fit values  $a = -0.7852 \pm 1.5\%$ , and  $b = 0.965 \pm 5\%$ . The  $\text{p}K_{\text{w}}$  values determined in several titrations coincided, within experimental errors, with the value reported in literature.<sup>2</sup> Potentiometric titrations were carried under a nitrogen atmosphere, on 6 mL of 1–3 mM solutions of the compound, in the presence of 0.1 M  $\text{Me}_4\text{NClO}_4$ , (80% DMSO, 25 °C). A 0.05–0.2 M  $\text{Me}_4\text{NOH}$  solution in 80% DMSO was added to the titration vessel in small increments. Analysis of titration plots was carried out by the program HYPERQUAD 2000.<sup>3</sup> Titration plots of ATP, ADP and  $\text{H}_3\text{PO}_4$  are shown in Figures 1S, 3S and 5S, respectively. The corresponding distribution diagrams are reported in Figures 2S, 4S and 6S.

**Potentiometric titration plots with  $(\text{CH}_3)_4\text{NOH}$  and species distribution diagrams of the given compounds (1-3 mM) in 80% DMSO (25 °C)**

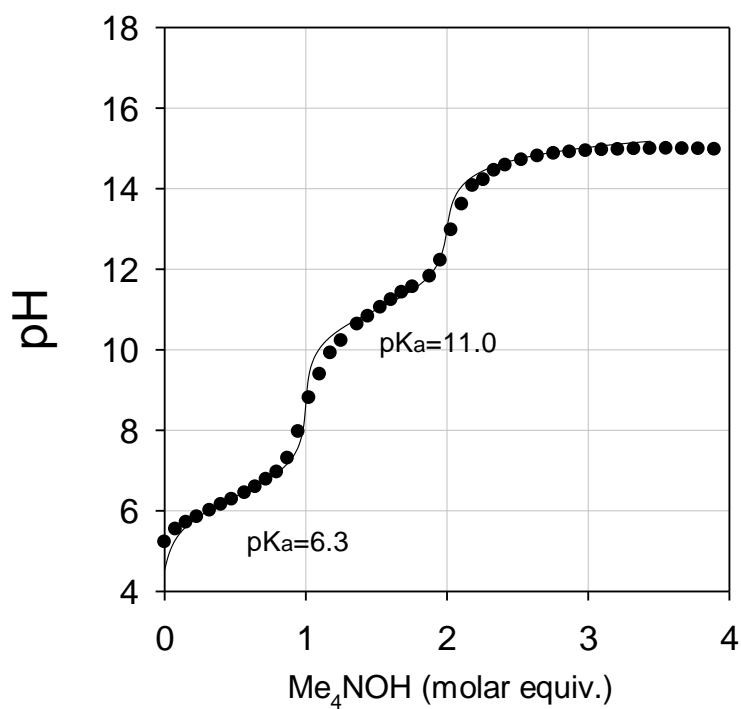

**Figure S1** Titration of  $\text{ATPH}_2\text{Na}_2$

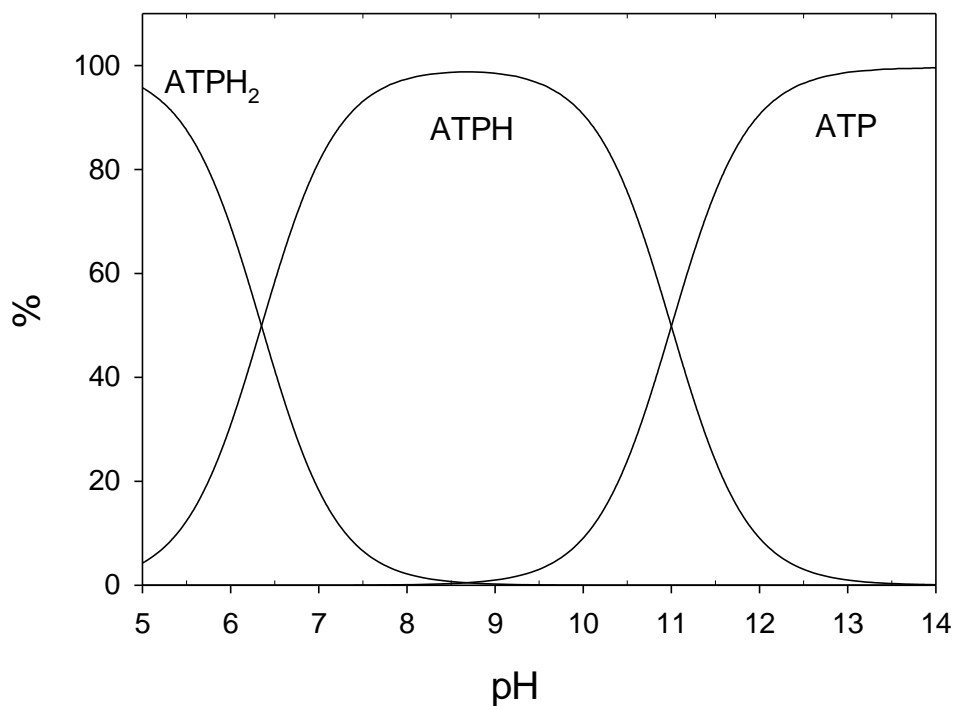

**Figure S2** Distribution diagram of ATP

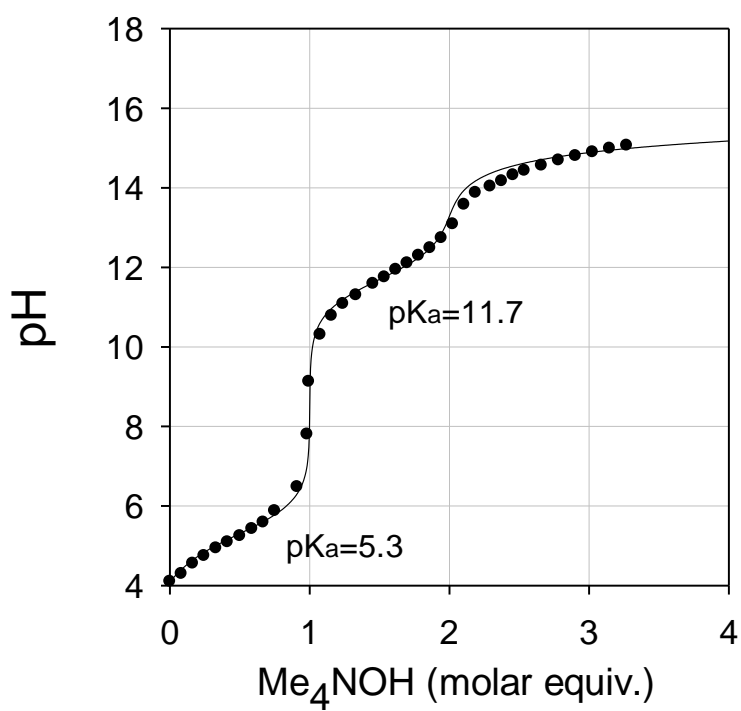

**Figure S3** Titration of ADPH<sub>2</sub>Na

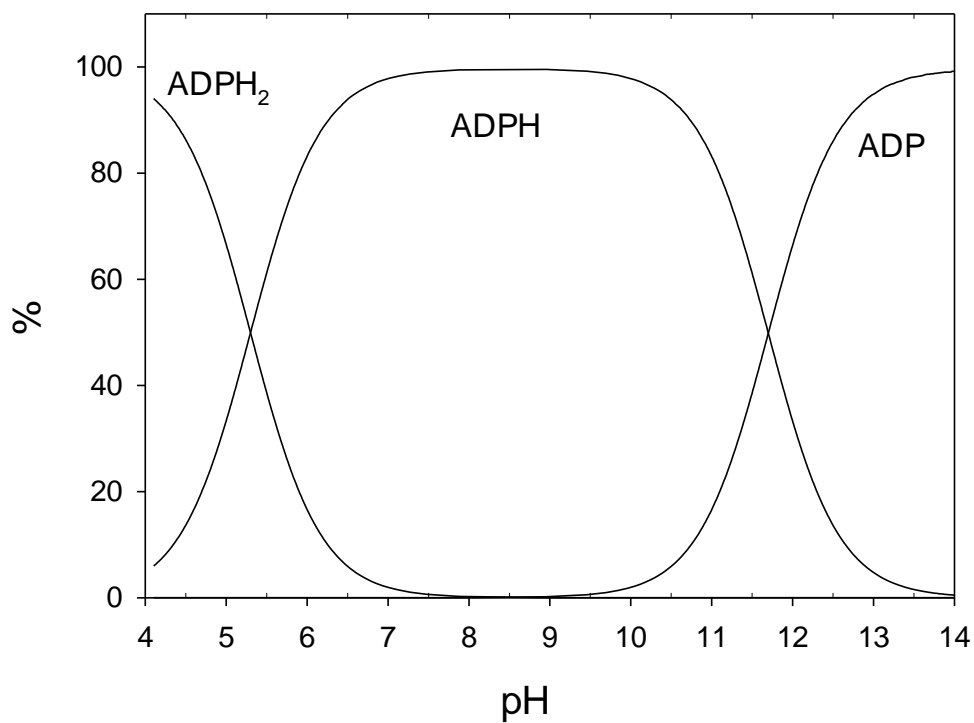

**Figure S4** Distribution diagram of ADP

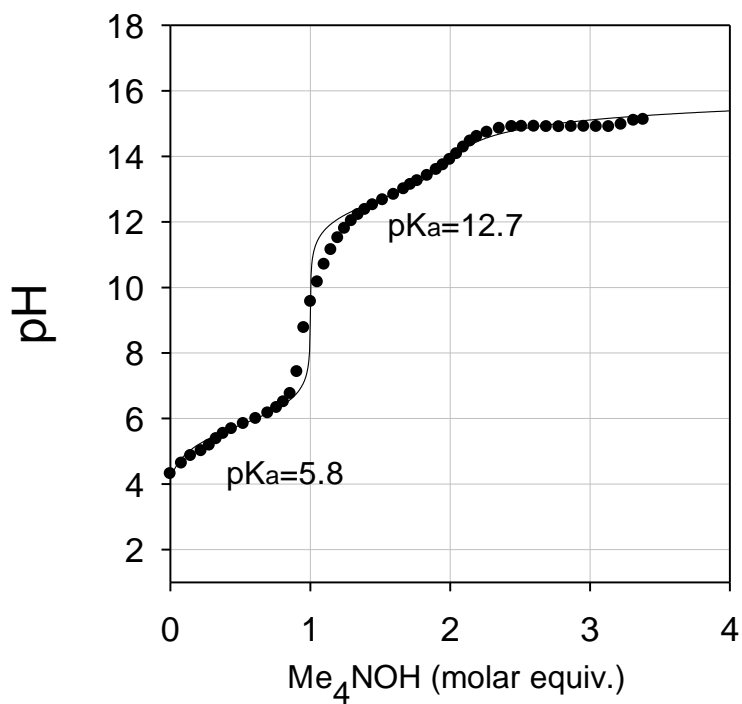

**Figure S5** Titration of  $\text{H}_3\text{PO}_4$

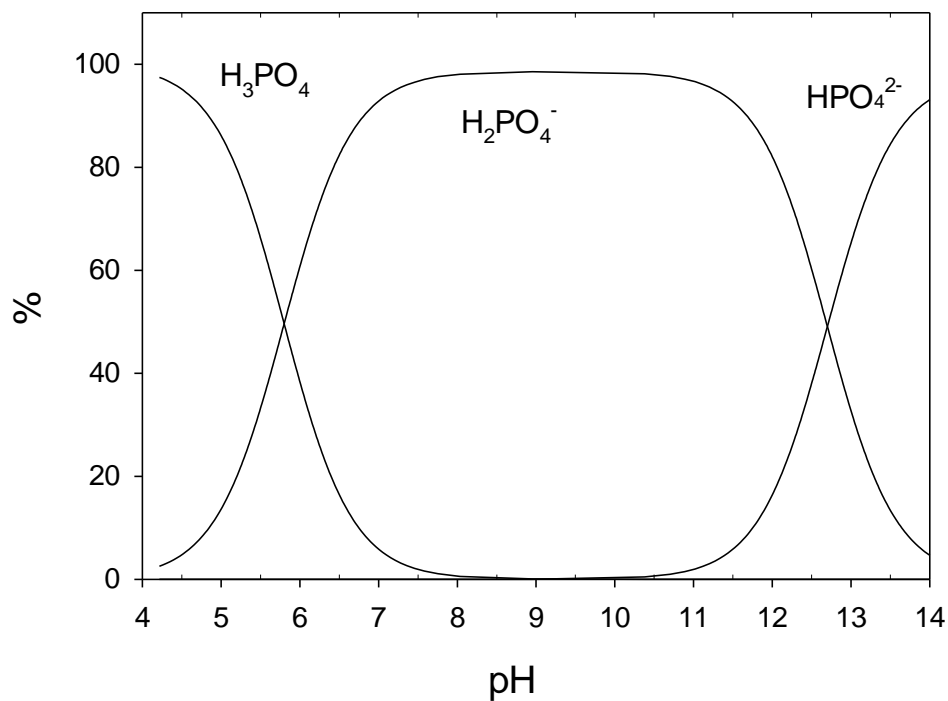

**Figure S6** Distribution diagram of  $\text{H}_3\text{PO}_4$

## Rate Measurements

The reaction progress was monitored by following the time dependent changes in the  $^{31}\text{P}$  NMR spectra of the signals of ATP, ADP and inorganic phosphate. The NMR acquisition time was set to 12 s to ensure the peak integrals to be proportional to concentrations of the different species. The quantity  $x$  in equations (2) and (3) was calculated as follows:  $x = I_{\text{P}} / (I_{\text{P}} + I_{\beta\text{-ATP}})$ , where  $I$  represents the integrated intensity of the given signal. Time-course kinetics were obtained for the cleavage of 10 mM ATP in the presence of varying concentrations of **1** (0.10, 0.20 and 0.40 mM) at pH 9.8. Figure S7 shows the poor adherence of a typical run to first-order behaviour and, conversely, the close adherence to the mixed first- and zero-order behaviour consistent with eq (3). Slower reactions were analyzed by an initial rate method. A typical time-concentration plot used in the determination of initial rates is shown in Figure S8.

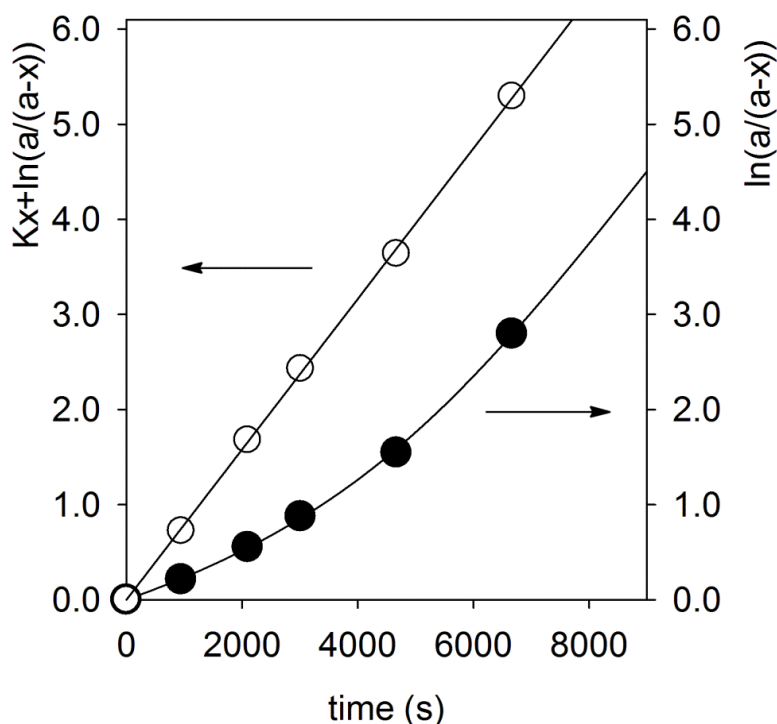

**Figure S7** Kinetic data for the cleavage of 10 mM ATP catalyzed by 0.20 mM **1**( $\text{H}^+$ )<sub>3</sub> in 80% DMSO (80 °C, 0.1 M  $\text{Me}_4\text{NClO}_4$ ). Plots of  $\ln(a/(a-x))$  (right) and  $Kx + \ln(a/(a-x))$  (left) against time.

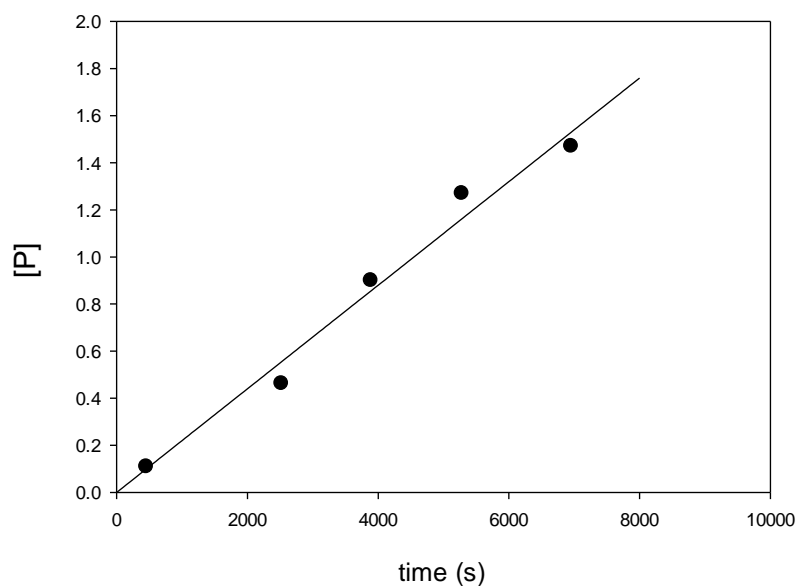

**Figure S8** Cleavage of 10 mM ATP in 80% DMSO catalyzed by 0.20 mM  $2(\text{H}^+)_2$  ( $T=80\text{ }^\circ\text{C}$ ,  $\text{pH } 9.7$ ,  $0.1\text{ M Me}_4\text{NClO}_4$ ).

## References

- <sup>1</sup> L. Baldini, R. Cacciapaglia, A. Casnati, L. Mandolini, R. Salvio, F. Sansone and R. Ungaro, *J. Org. Chem.*, 2012, **77**, 3381
- <sup>2</sup> M. M. Kreevoy and E. H. Baughman, *J. Phys. Chem.*, 1974, **78**, 421
- <sup>3</sup> L. Alderighi, P. Gans, A. Ienco, D. Peters, A. Sabatini and A. Vacca, *Coord. Chem. Rev.*, 1999, **184**, 311
